# Supplementary material for: Predictability modulates neural response to eye contact in ASD
Source: Springer Nature journal article supplement (doi:10.1186/s13229-022-00519-0), 2022-10-29
Supplement: MOESM1 [file 23656380]

# Supplement 1: Exploration of Sex, Proportion of artifact free trials, and IQ on dependent measures

## 1. Analytic models including Sex as a factor.

**Table 1:** Experiment 1: N170 Amplitude including Sex

|                  | num Df | den Df | MSE   | F      | pes   | Pr(>F) |
|------------------|--------|--------|-------|--------|-------|--------|
| DX               | 1.000  | 65.000 | 7.228 | 0.001  | 0.000 | 0.971  |
| Sex              | 1.000  | 65.000 | 7.228 | 1.933  | 0.029 | 0.169  |
| DX:Sex           | 1.000  | 65.000 | 7.228 | 2.257  | 0.034 | 0.138  |
| condition        | 1.000  | 65.000 | 1.020 | 19.519 | 0.231 | 0.000  |
| DX:condition     | 1.000  | 65.000 | 1.020 | 1.232  | 0.019 | 0.271  |
| Sex:condition    | 1.000  | 65.000 | 1.020 | 1.307  | 0.020 | 0.257  |
| DX:Sex:condition | 1.000  | 65.000 | 1.020 | 2.389  | 0.035 | 0.127  |

Experiment 1: N170 Amplitude including Sex

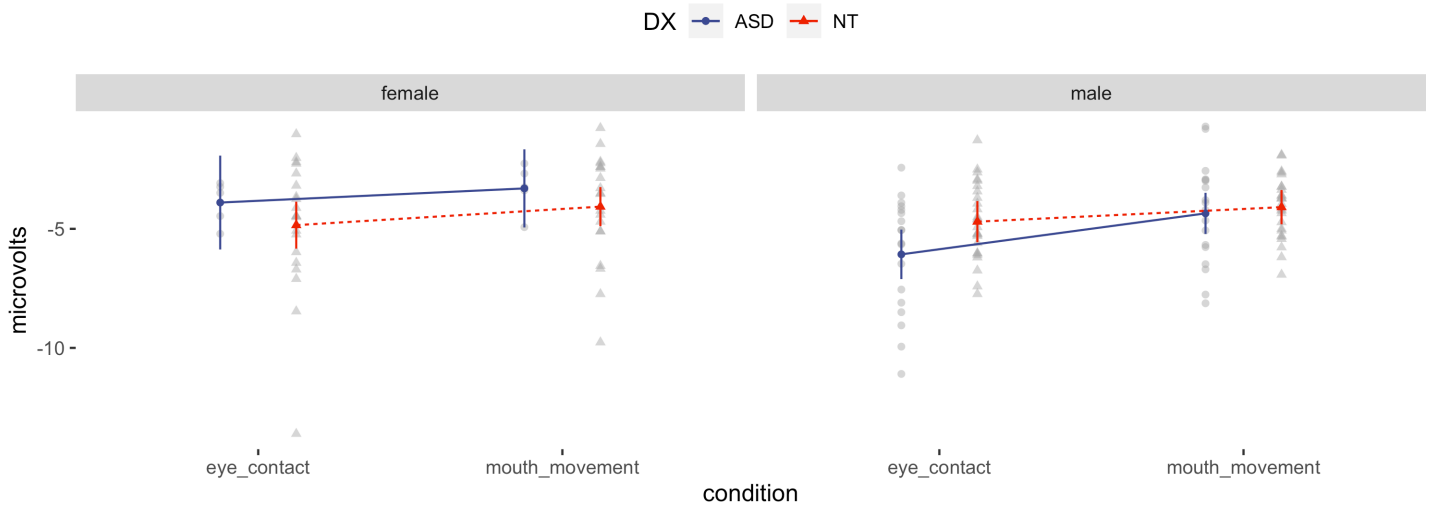

**Table 2:** Experiment 1: N170 Latency including Sex

|                  | num Df | den Df | MSE     | F     | pes   | Pr(>F) |
|------------------|--------|--------|---------|-------|-------|--------|
| DX               | 1.000  | 65.000 | 542.801 | 0.407 | 0.006 | 0.526  |
| Sex              | 1.000  | 65.000 | 542.801 | 2.321 | 0.034 | 0.132  |
| DX:Sex           | 1.000  | 65.000 | 542.801 | 0.652 | 0.010 | 0.422  |
| condition        | 1.000  | 65.000 | 123.084 | 6.902 | 0.096 | 0.011  |
| DX:condition     | 1.000  | 65.000 | 123.084 | 2.094 | 0.031 | 0.153  |
| Sex:condition    | 1.000  | 65.000 | 123.084 | 0.079 | 0.001 | 0.779  |
| DX:Sex:condition | 1.000  | 65.000 | 123.084 | 1.246 | 0.019 | 0.268  |

Experiment 1: N170 Latency including Sex

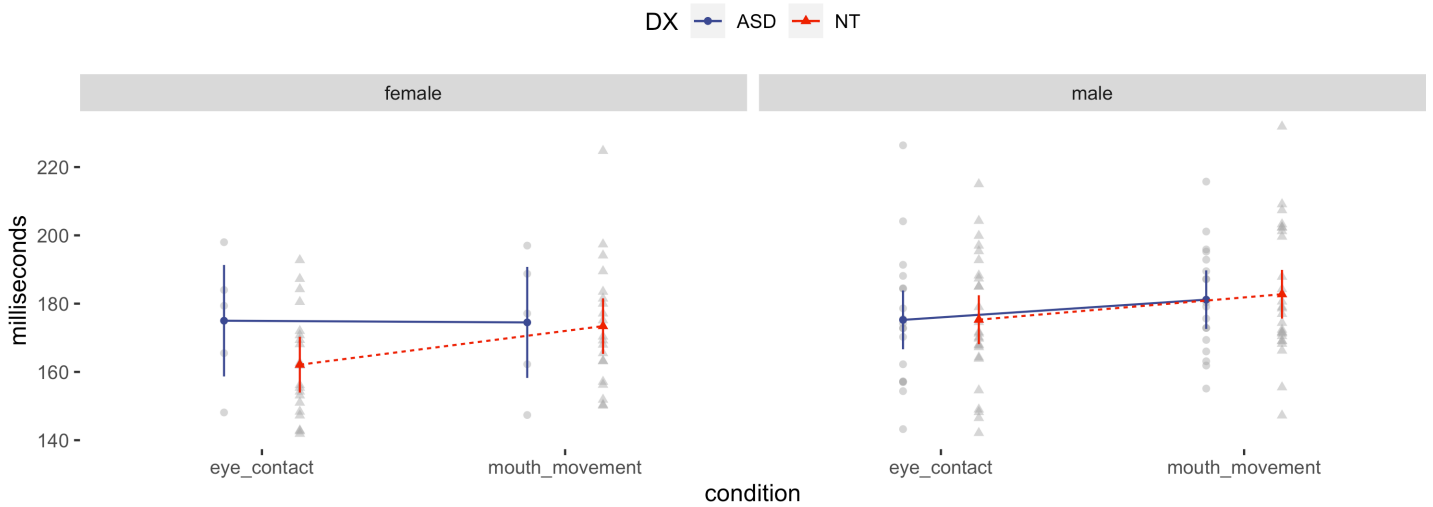

**Table 3:** Experiment 1: P300 Amplitude including Sex

|                  | num Df | den Df | MSE   | F     | pes   | Pr(>F)       |
|------------------|--------|--------|-------|-------|-------|--------------|
| DX               | 1.000  | 65.000 | 6.591 | 6.875 | 0.096 | <i>0.011</i> |
| Sex              | 1.000  | 65.000 | 6.591 | 0.015 | 0.000 | <i>0.903</i> |
| DX:Sex           | 1.000  | 65.000 | 6.591 | 0.001 | 0.000 | <i>0.981</i> |
| condition        | 1.000  | 65.000 | 0.622 | 7.152 | 0.099 | <i>0.009</i> |
| DX:condition     | 1.000  | 65.000 | 0.622 | 5.488 | 0.078 | <i>0.022</i> |
| Sex:condition    | 1.000  | 65.000 | 0.622 | 0.020 | 0.000 | <i>0.887</i> |
| DX:Sex:condition | 1.000  | 65.000 | 0.622 | 0.179 | 0.003 | <i>0.674</i> |

Experiment 1: P300 Amplitude including Sex

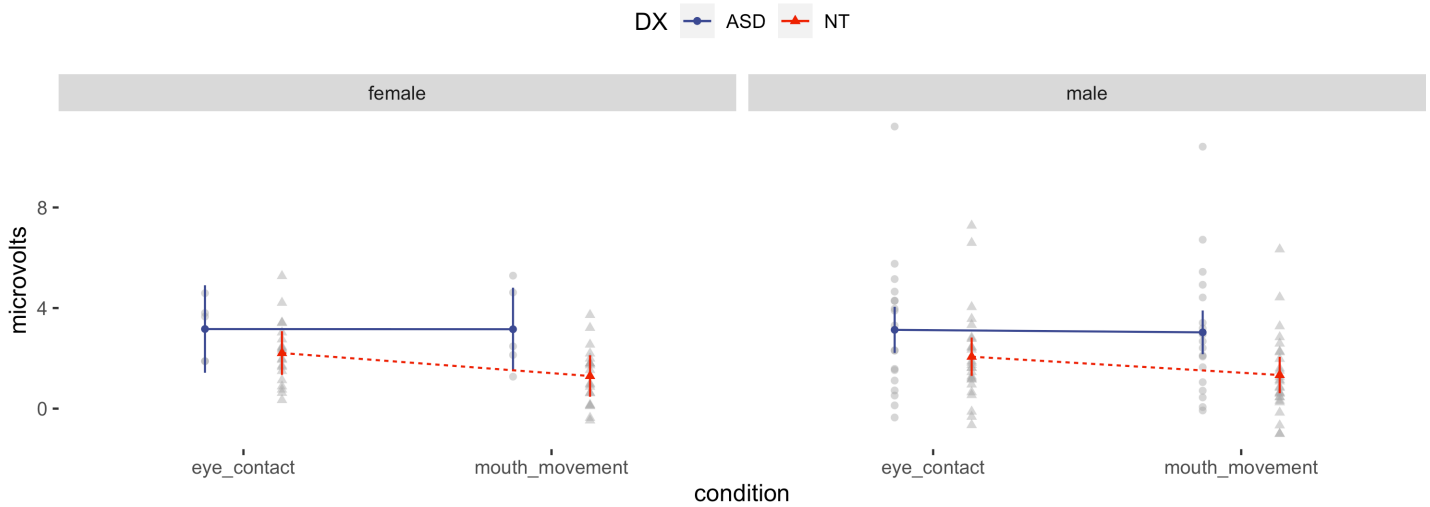

**Table 4:** Experiment 2: N170 Amplitude including Sex

|                  | num Df | den Df | MSE   | F      | pes   | Pr(>F)       |
|------------------|--------|--------|-------|--------|-------|--------------|
| DX               | 1.000  | 64.000 | 4.380 | 3.565  | 0.053 | <i>0.064</i> |
| Sex              | 1.000  | 64.000 | 4.380 | 0.041  | 0.001 | <i>0.840</i> |
| DX:Sex           | 1.000  | 64.000 | 4.380 | 0.648  | 0.010 | <i>0.424</i> |
| condition        | 1.000  | 64.000 | 0.446 | 11.902 | 0.157 | <i>0.001</i> |
| DX:condition     | 1.000  | 64.000 | 0.446 | 0.002  | 0.000 | <i>0.969</i> |
| Sex:condition    | 1.000  | 64.000 | 0.446 | 0.924  | 0.014 | <i>0.340</i> |
| DX:Sex:condition | 1.000  | 64.000 | 0.446 | 2.697  | 0.040 | <i>0.105</i> |

Experiment 2: N170 Amplitude including Sex

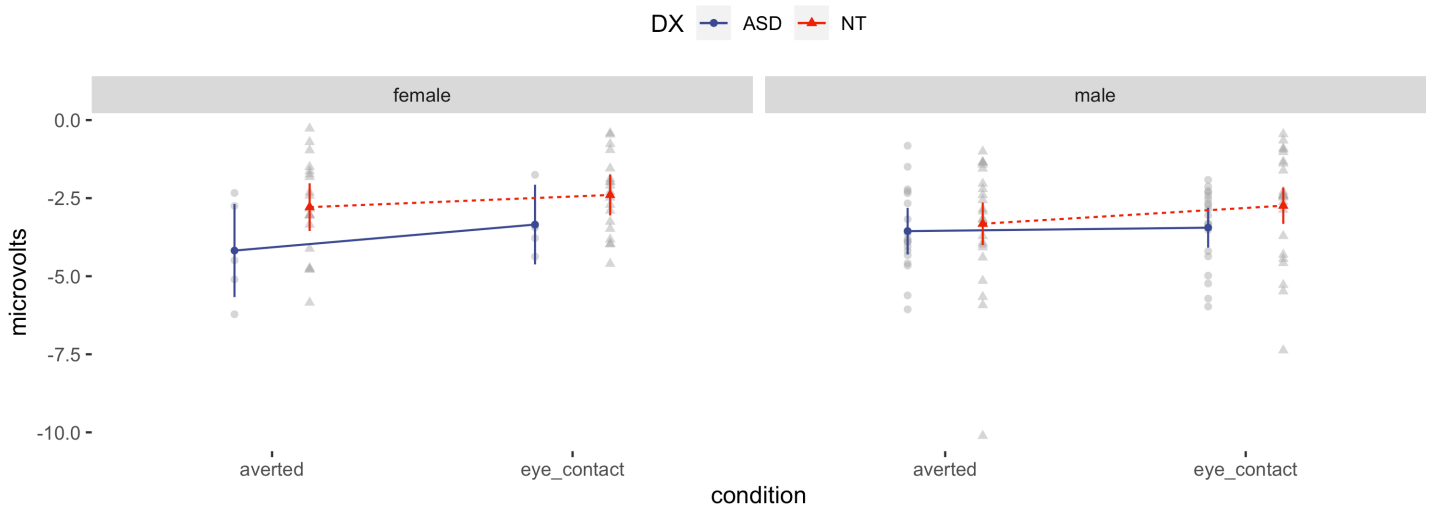

**Table 5:** Experiment 2: N170 Latency including Sex

|                  | num Df | den Df | MSE     | F     | pes   | Pr(>F)       |
|------------------|--------|--------|---------|-------|-------|--------------|
| DX               | 1.000  | 64.000 | 677.751 | 7.970 | 0.111 | <i>0.006</i> |
| Sex              | 1.000  | 64.000 | 677.751 | 0.852 | 0.013 | <i>0.359</i> |
| DX:Sex           | 1.000  | 64.000 | 677.751 | 2.264 | 0.034 | <i>0.137</i> |
| condition        | 1.000  | 64.000 | 192.949 | 0.012 | 0.000 | <i>0.914</i> |
| DX:condition     | 1.000  | 64.000 | 192.949 | 1.730 | 0.026 | <i>0.193</i> |
| Sex:condition    | 1.000  | 64.000 | 192.949 | 3.283 | 0.049 | <i>0.075</i> |
| DX:Sex:condition | 1.000  | 64.000 | 192.949 | 0.473 | 0.007 | <i>0.494</i> |

Experiment 2: N170 Latency including Sex

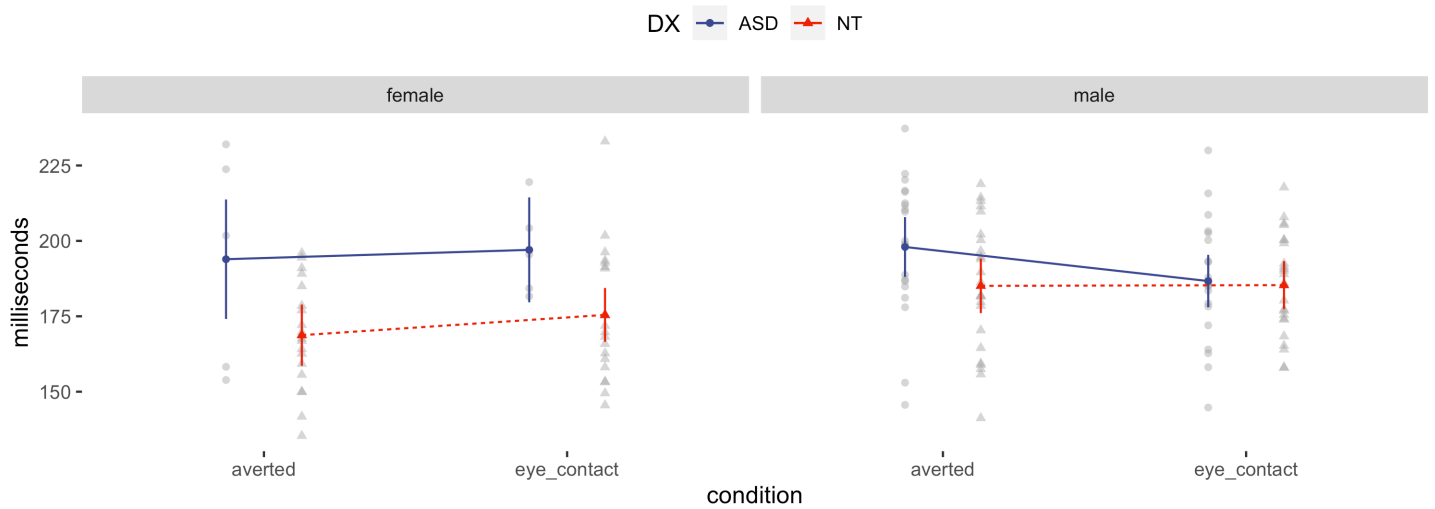

**Table 6:** Experiment 2: P300 Amplitude including Sex

|                  | num Df | den Df | MSE   | F     | pes   | Pr(>F) |
|------------------|--------|--------|-------|-------|-------|--------|
| DX               | 1.000  | 64.000 | 2.592 | 0.267 | 0.004 | 0.607  |
| Sex              | 1.000  | 64.000 | 2.592 | 0.025 | 0.000 | 0.874  |
| DX:Sex           | 1.000  | 64.000 | 2.592 | 0.162 | 0.003 | 0.689  |
| condition        | 1.000  | 64.000 | 0.832 | 4.010 | 0.059 | 0.049  |
| DX:condition     | 1.000  | 64.000 | 0.832 | 0.215 | 0.003 | 0.644  |
| Sex:condition    | 1.000  | 64.000 | 0.832 | 0.045 | 0.001 | 0.832  |
| DX:Sex:condition | 1.000  | 64.000 | 0.832 | 0.510 | 0.008 | 0.478  |

Experiment 2: P300 Amplitude including Sex

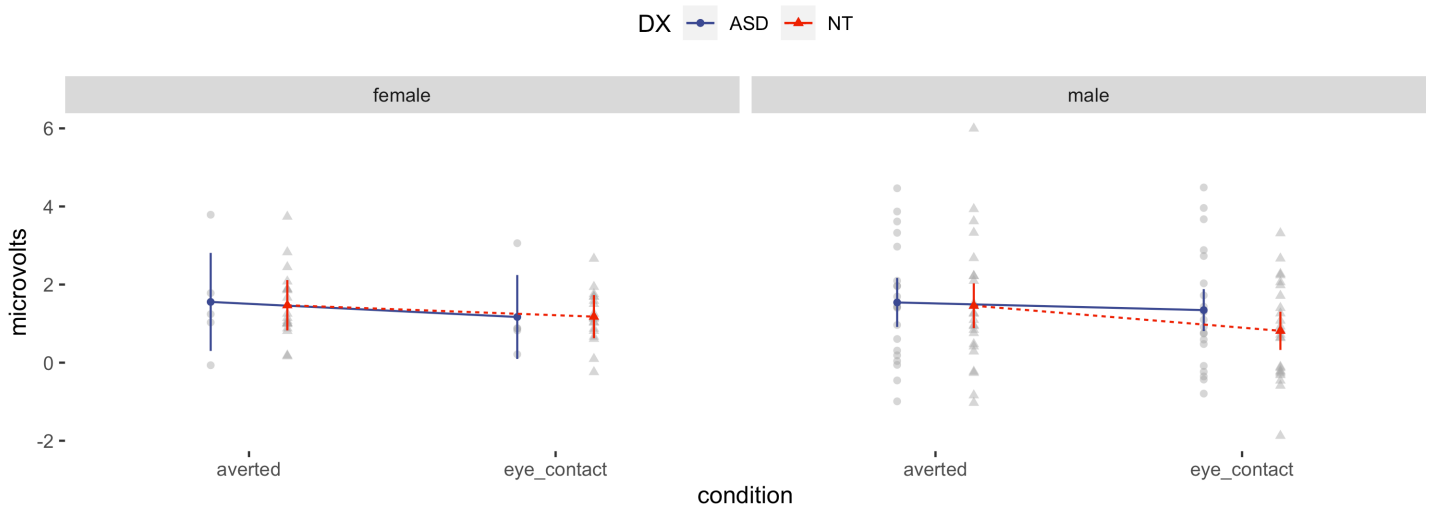

## 2. Analytic models including # of good trials as a covariate

Table 7: Experiment 2: P300 Amplitude with trial count

|                         | num Df | den Df | MSE   | F     | pes   | Pr(>F) |
|-------------------------|--------|--------|-------|-------|-------|--------|
| DX                      | 1.000  | 64.000 | 2.349 | 0.236 | 0.004 | 0.629  |
| trialCount              | 1.000  | 64.000 | 2.349 | 5.175 | 0.075 | 0.026  |
| DX:trialCount           | 1.000  | 64.000 | 2.349 | 1.479 | 0.023 | 0.228  |
| condition               | 1.000  | 64.000 | 0.800 | 0.742 | 0.011 | 0.392  |
| DX:condition            | 1.000  | 64.000 | 0.800 | 0.815 | 0.013 | 0.370  |
| trialCount:condition    | 1.000  | 64.000 | 0.800 | 0.216 | 0.003 | 0.644  |
| DX:trialCount:condition | 1.000  | 64.000 | 0.800 | 0.331 | 0.005 | 0.567  |

Experiment 2: P300 Amplitude with trial count

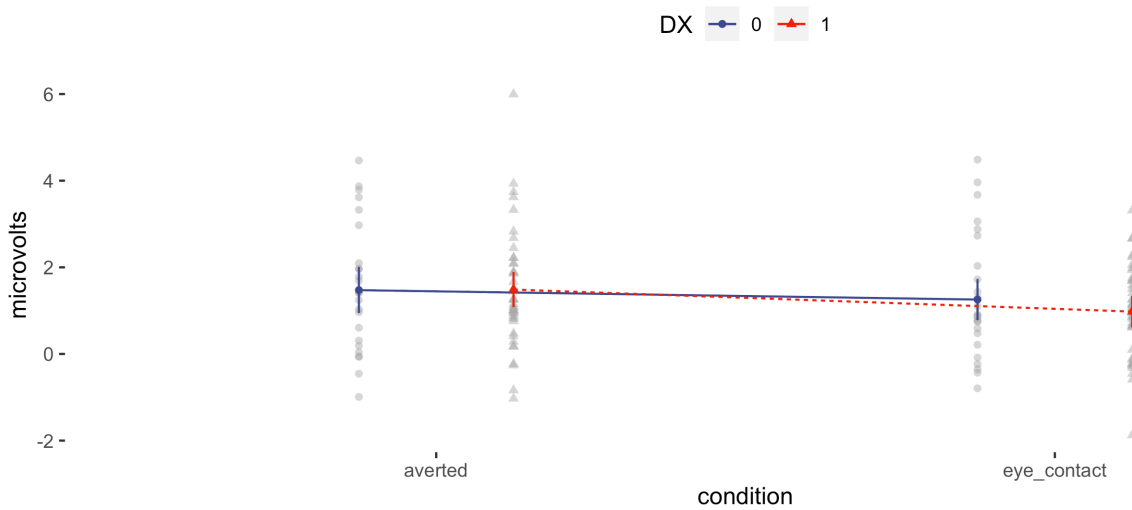

**Table 8:** Experiment 1: P300 Amplitude with trial count

|                         | num Df | den Df | MSE   | F     | pes   | Pr(>F)       |
|-------------------------|--------|--------|-------|-------|-------|--------------|
| DX                      | 1.000  | 65.000 | 6.591 | 8.619 | 0.117 | <i>0.005</i> |
| trialCount              | 1.000  | 65.000 | 6.591 | 0.001 | 0.000 | <i>0.975</i> |
| DX:trialCount           | 1.000  | 65.000 | 6.591 | 0.006 | 0.000 | <i>0.938</i> |
| condition               | 1.000  | 65.000 | 0.591 | 0.001 | 0.000 | <i>0.981</i> |
| DX:condition            | 1.000  | 65.000 | 0.591 | 7.982 | 0.109 | <i>0.006</i> |
| trialCount:condition    | 1.000  | 65.000 | 0.591 | 3.475 | 0.051 | <i>0.067</i> |
| DX:trialCount:condition | 1.000  | 65.000 | 0.591 | 3.361 | 0.049 | <i>0.071</i> |

Experiment 1: P300 Amplitude with trial count

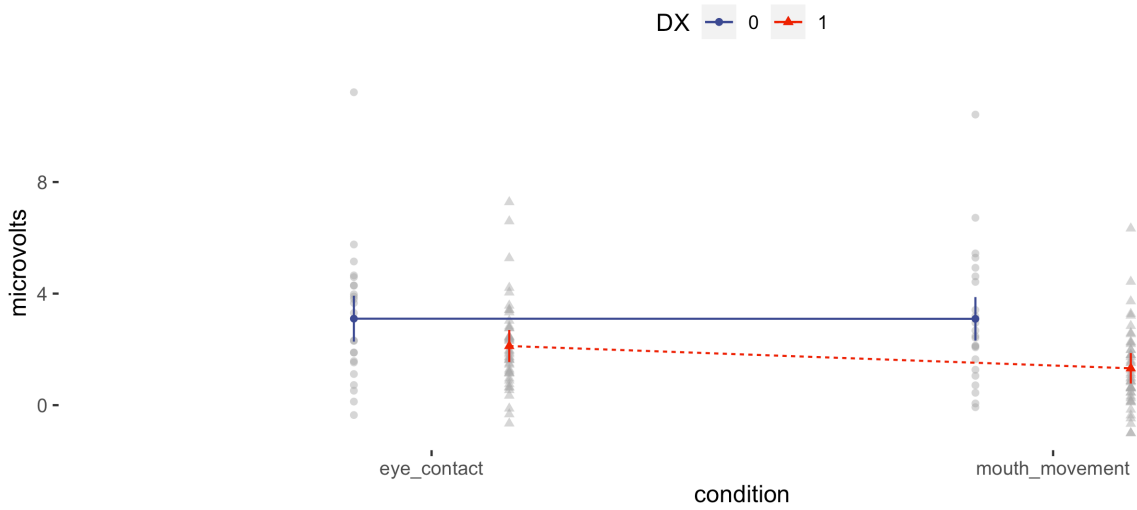



**Table 9:** Experiment 2: N170 Latency with Trial Count

|                         | num Df | den Df | MSE     | F     | pes   | Pr(>F)       |
|-------------------------|--------|--------|---------|-------|-------|--------------|
| DX                      | 1.000  | 64.000 | 734.559 | 7.807 | 0.109 | <i>0.007</i> |
| trialCount              | 1.000  | 64.000 | 734.559 | 0.014 | 0.000 | <i>0.905</i> |
| DX:trialCount           | 1.000  | 64.000 | 734.559 | 0.076 | 0.001 | <i>0.783</i> |
| condition               | 1.000  | 64.000 | 200.735 | 4.145 | 0.061 | <i>0.046</i> |
| DX:condition            | 1.000  | 64.000 | 200.735 | 4.876 | 0.071 | <i>0.031</i> |
| trialCount:condition    | 1.000  | 64.000 | 200.735 | 0.164 | 0.003 | <i>0.687</i> |
| DX:trialCount:condition | 1.000  | 64.000 | 200.735 | 0.002 | 0.000 | <i>0.964</i> |

Experiment 2: N170 Latency with trial count

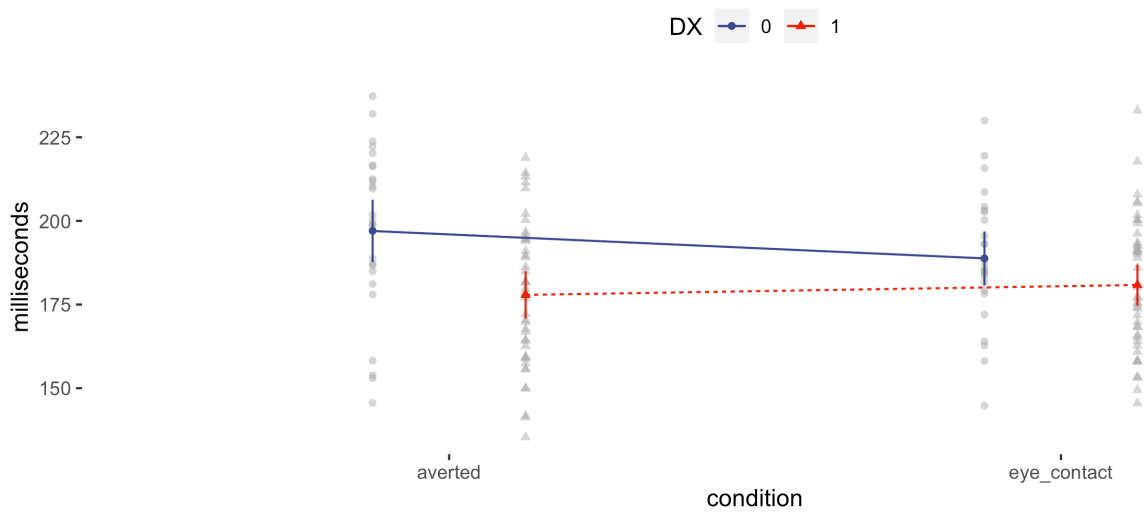

**Table 10:** Experiment 2: N170 Amplitude with Trial Count

|                         | num Df | den Df | MSE   | F     | pes   | Pr(>F)       |
|-------------------------|--------|--------|-------|-------|-------|--------------|
| DX                      | 1.000  | 64.000 | 4.087 | 3.517 | 0.052 | <i>0.065</i> |
| trialCount              | 1.000  | 64.000 | 4.087 | 0.034 | 0.001 | <i>0.853</i> |
| DX:trialCount           | 1.000  | 64.000 | 4.087 | 1.238 | 0.019 | <i>0.270</i> |
| condition               | 1.000  | 64.000 | 0.438 | 2.478 | 0.037 | <i>0.120</i> |
| DX:condition            | 1.000  | 64.000 | 0.438 | 0.755 | 0.012 | <i>0.388</i> |
| trialCount:condition    | 1.000  | 64.000 | 0.438 | 3.035 | 0.045 | <i>0.086</i> |
| DX:trialCount:condition | 1.000  | 64.000 | 0.438 | 3.971 | 0.058 | <i>0.051</i> |

Experiment 2: N170 Amplitude with trial count

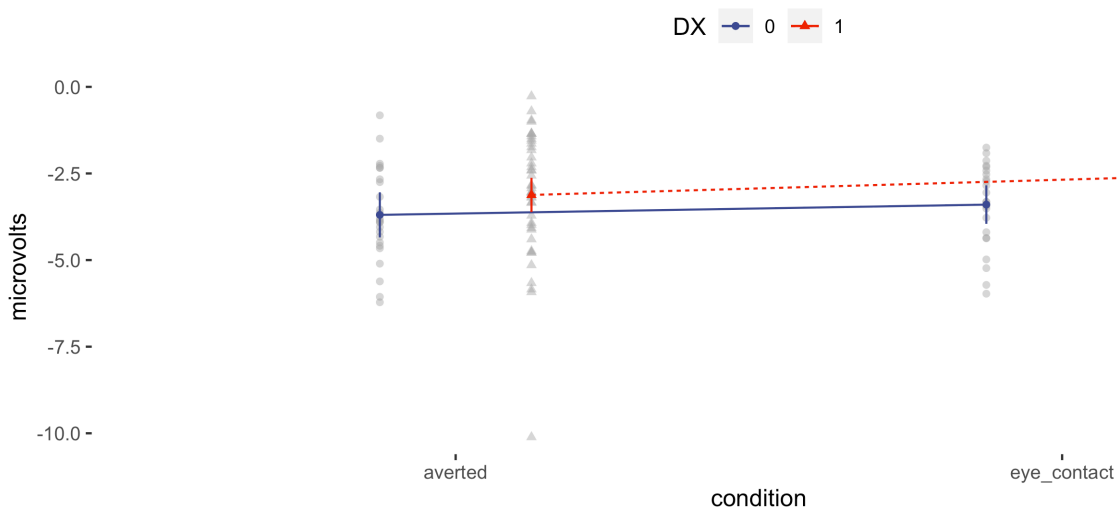

**Table 11:** Experiment 1: N170 Amplitude with Trial Count

|                         | num Df | den Df | MSE   | F      | pes   | Pr(>F) |
|-------------------------|--------|--------|-------|--------|-------|--------|
| DX                      | 1.000  | 65.000 | 7.478 | 0.969  | 0.015 | 0.329  |
| trialCount              | 1.000  | 65.000 | 7.478 | 0.264  | 0.004 | 0.609  |
| DX:trialCount           | 1.000  | 65.000 | 7.478 | 0.004  | 0.000 | 0.951  |
| condition               | 1.000  | 65.000 | 1.008 | 26.883 | 0.293 | 0.000  |
| DX:condition            | 1.000  | 65.000 | 1.008 | 5.961  | 0.084 | 0.017  |
| trialCount:condition    | 1.000  | 65.000 | 1.008 | 2.536  | 0.038 | 0.116  |
| DX:trialCount:condition | 1.000  | 65.000 | 1.008 | 0.472  | 0.007 | 0.495  |

Experiment 1: N170 Amplitude with trial count

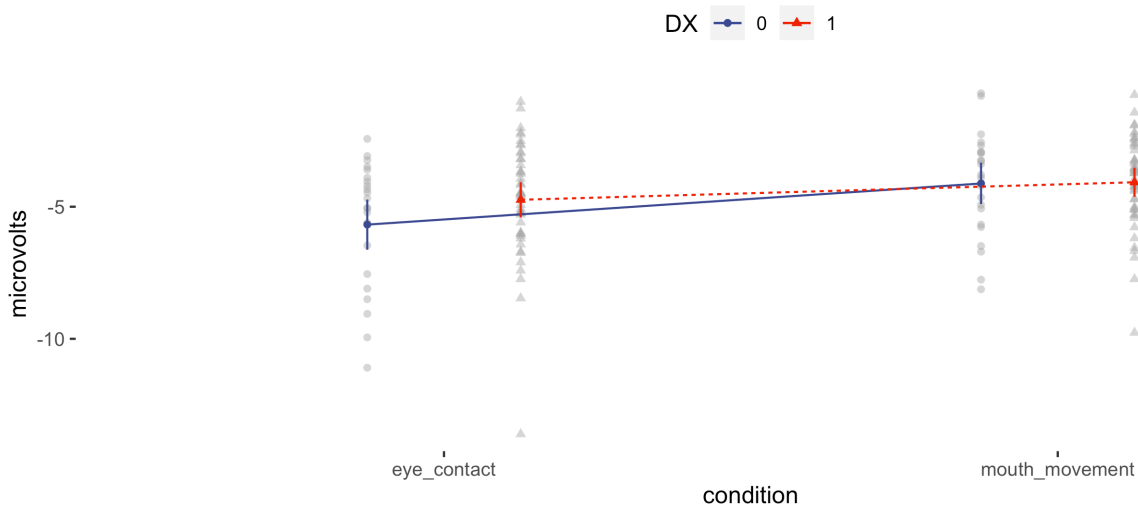

**Table 12:** Experiment 1: N170 Latency with Trial Count

|                         | num Df | den Df | MSE     | F     | pes   | Pr(>F) |
|-------------------------|--------|--------|---------|-------|-------|--------|
| DX                      | 1.000  | 65.000 | 576.764 | 0.365 | 0.006 | 0.548  |
| trialCount              | 1.000  | 65.000 | 576.764 | 0.531 | 0.008 | 0.469  |
| DX:trialCount           | 1.000  | 65.000 | 576.764 | 0.001 | 0.000 | 0.982  |
| condition               | 1.000  | 65.000 | 124.854 | 1.767 | 0.026 | 0.188  |
| DX:condition            | 1.000  | 65.000 | 124.854 | 1.391 | 0.021 | 0.243  |
| trialCount:condition    | 1.000  | 65.000 | 124.854 | 0.021 | 0.000 | 0.884  |
| DX:trialCount:condition | 1.000  | 65.000 | 124.854 | 0.070 | 0.001 | 0.792  |

Experiment 1: N170 Latency with trial count

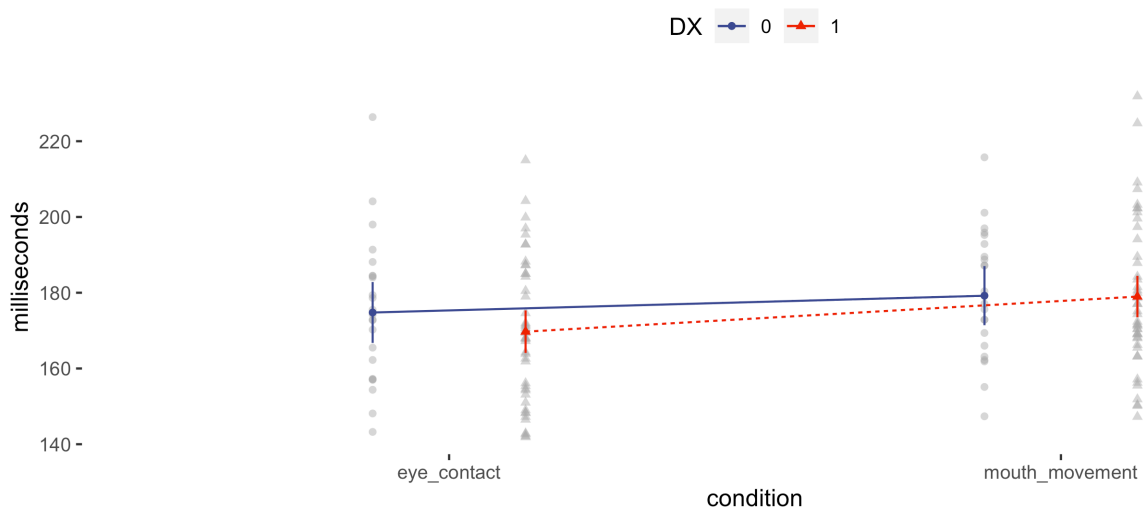

### 3. Analytic Models including IQ as a covariate

Table 13: Experiment 1: N170 Amplitude including IQ

|              | num Df | den Df | MSE   | F      | pes   | Pr(>F) |
|--------------|--------|--------|-------|--------|-------|--------|
| DX           | 1.000  | 28.000 | 8.151 | 0.624  | 0.022 | 0.436  |
| IQ           | 39.000 | 28.000 | 8.151 | 0.824  | 0.535 | 0.715  |
| condition    | 1.000  | 28.000 | 1.067 | 28.909 | 0.508 | 0.000  |
| DX:condition | 1.000  | 28.000 | 1.067 | 3.201  | 0.103 | 0.084  |
| IQ:condition | 39.000 | 28.000 | 1.067 | 0.937  | 0.566 | 0.580  |

Experiment 1: N170 Amplitude including IQ

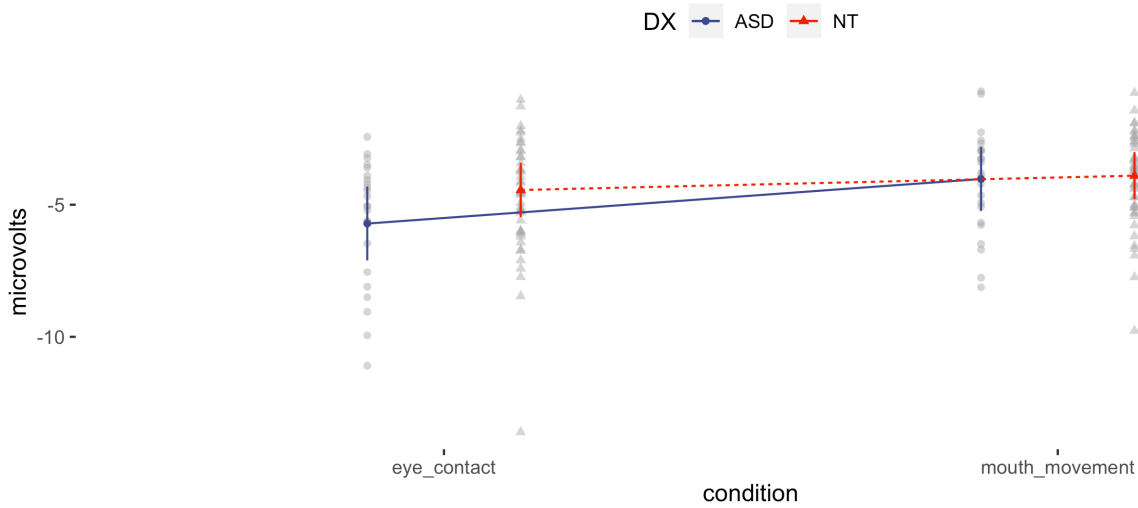

**Table 14:** Experiment 1: N170 Latency including IQ

|              | num Df | den Df | MSE     | F     | pes   | Pr(>F)       |
|--------------|--------|--------|---------|-------|-------|--------------|
| DX           | 1.000  | 28.000 | 664.917 | 1.034 | 0.036 | <i>0.318</i> |
| IQ           | 39.000 | 28.000 | 664.917 | 0.757 | 0.513 | <i>0.792</i> |
| condition    | 1.000  | 28.000 | 158.022 | 6.562 | 0.190 | <b>0.016</b> |
| DX:condition | 1.000  | 28.000 | 158.022 | 2.683 | 0.087 | <i>0.113</i> |
| IQ:condition | 39.000 | 28.000 | 158.022 | 0.607 | 0.458 | <i>0.926</i> |

Experiment 1: N170 Latency including IQ

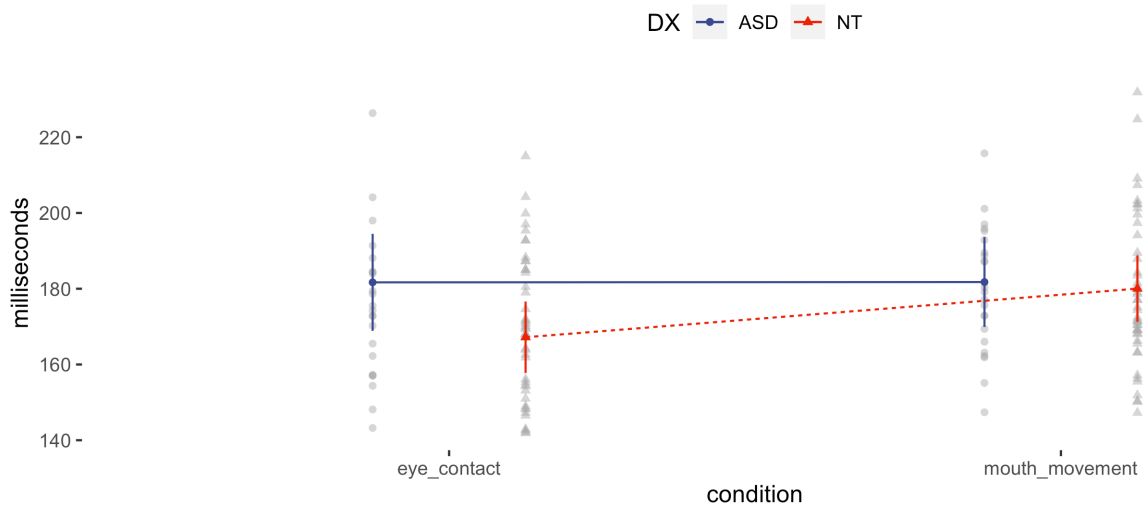

**Table 15: Experiment 1: P300 Amplitude including IQ**

|              | num Df | den Df | MSE   | F      | pes   | Pr(>F)       |
|--------------|--------|--------|-------|--------|-------|--------------|
| DX           | 1.000  | 28.000 | 4.146 | 11.634 | 0.294 | <i>0.002</i> |
| IQ           | 39.000 | 28.000 | 4.146 | 1.932  | 0.729 | <i>0.036</i> |
| condition    | 1.000  | 28.000 | 0.762 | 7.097  | 0.202 | <i>0.013</i> |
| DX:condition | 1.000  | 28.000 | 0.762 | 4.823  | 0.147 | <i>0.037</i> |
| IQ:condition | 39.000 | 28.000 | 0.762 | 0.649  | 0.475 | <i>0.895</i> |

Experiment 1: P300 Amplitude including IQ

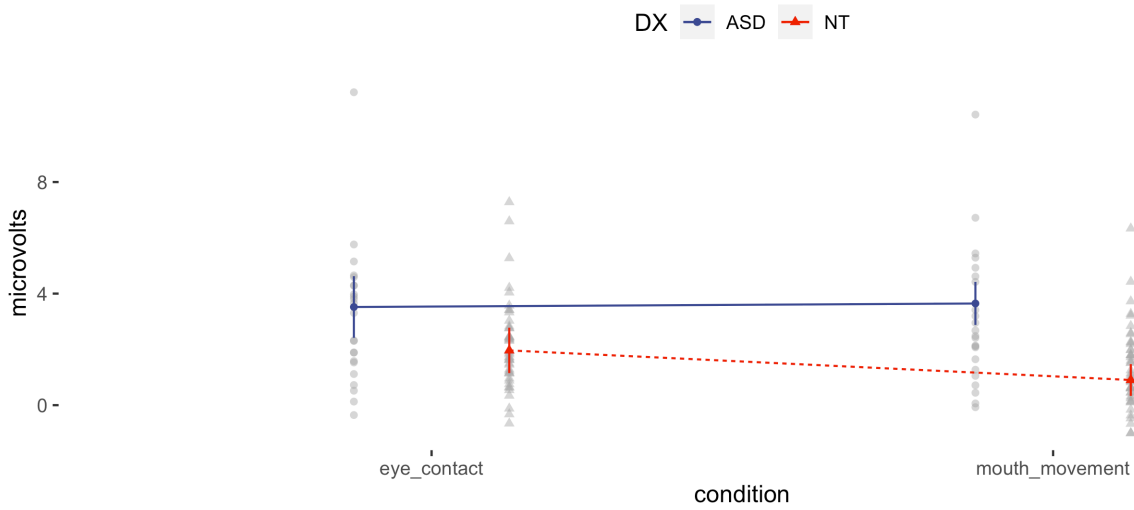

**Table 16:** Experiment 2: N170 Amplitude including IQ

|              | num Df | den Df | MSE   | F      | pes   | Pr(>F)       |
|--------------|--------|--------|-------|--------|-------|--------------|
| DX           | 1.000  | 28.000 | 4.014 | 3.567  | 0.113 | <i>0.069</i> |
| IQ           | 38.000 | 28.000 | 4.014 | 1.131  | 0.606 | <i>0.371</i> |
| condition    | 1.000  | 28.000 | 0.401 | 10.188 | 0.267 | <i>0.003</i> |
| DX:condition | 1.000  | 28.000 | 0.401 | 0.000  | 0.000 | <i>0.997</i> |
| IQ:condition | 38.000 | 28.000 | 0.401 | 1.214  | 0.622 | <i>0.299</i> |

Experiment 2: N170 Amplitude including IQ

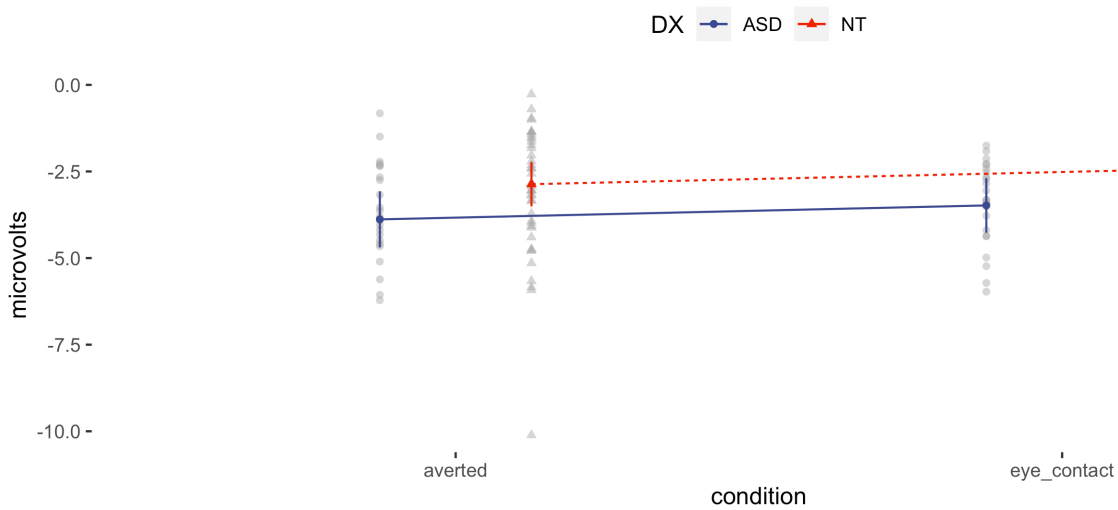



**Table 17: Experiment 2: N170 Latency including IQ**

|              | num Df | den Df | MSE     | F     | pes   | Pr(>F)       |
|--------------|--------|--------|---------|-------|-------|--------------|
| DX           | 1.000  | 28.000 | 992.863 | 7.384 | 0.209 | <i>0.011</i> |
| IQ           | 38.000 | 28.000 | 992.863 | 0.512 | 0.410 | <i>0.973</i> |
| condition    | 1.000  | 28.000 | 224.035 | 0.985 | 0.034 | <i>0.329</i> |
| DX:condition | 1.000  | 28.000 | 224.035 | 7.254 | 0.206 | <i>0.012</i> |
| IQ:condition | 38.000 | 28.000 | 224.035 | 0.789 | 0.517 | <i>0.755</i> |

Experiment 2: N170 Latency including IQ

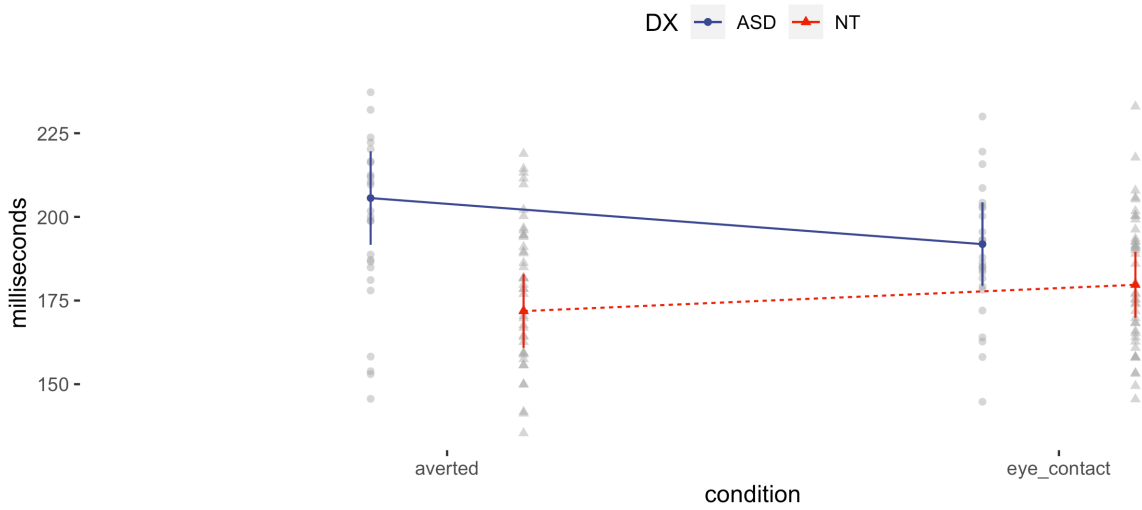

**Table 18:** Experiment 2: P300 Amplitude including IQ

|              | num Df | den Df | MSE   | F     | pes   | Pr(>F) |
|--------------|--------|--------|-------|-------|-------|--------|
| DX           | 1.000  | 28.000 | 2.524 | 0.630 | 0.022 | 0.434  |
| IQ           | 38.000 | 28.000 | 2.524 | 1.001 | 0.576 | 0.506  |
| condition    | 1.000  | 28.000 | 0.542 | 8.939 | 0.242 | 0.006  |
| DX:condition | 1.000  | 28.000 | 0.542 | 0.006 | 0.000 | 0.939  |
| IQ:condition | 38.000 | 28.000 | 0.542 | 1.885 | 0.719 | 0.042  |

Experiment 2: P300 Amplitude including IQ

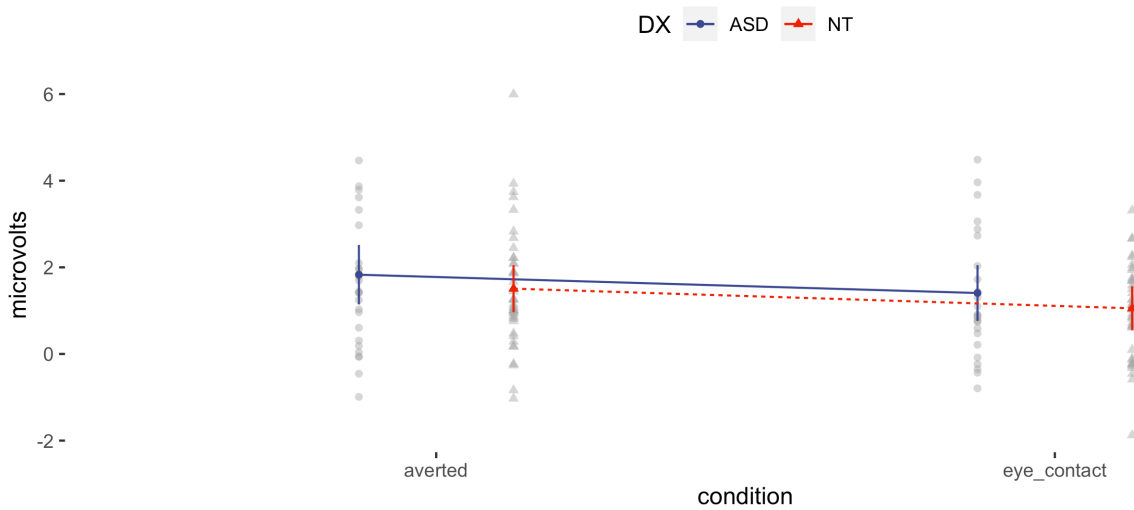

## 4. Means and standard deviations of dependent measures.

*Table 19: Means and SDs for all Dependent Variables*

| DX  | experimental_condition | component                 | mean    | sd     | N      | experiment          |
|-----|------------------------|---------------------------|---------|--------|--------|---------------------|
| ASD | eye_contact            | N170 Amplitude            | -5.599  | 2.358  | 23.000 | <i>Experiment 1</i> |
| ASD | eye_contact            | N170 Latency              | 175.190 | 19.244 | 23.000 | <i>Experiment 1</i> |
| ASD | mouth_movement         | N170 Amplitude            | -4.123  | 1.971  | 23.000 | <i>Experiment 1</i> |
| ASD | mouth_movement         | N170 Latency              | 179.723 | 16.490 | 23.000 | <i>Experiment 1</i> |
| NT  | eye_contact            | N170 Amplitude            | -4.762  | 2.177  | 46.000 | <i>Experiment 1</i> |
| NT  | eye_contact            | N170 Latency              | 169.571 | 18.589 | 46.000 | <i>Experiment 1</i> |
| NT  | mouth_movement         | N170 Amplitude            | -4.081  | 1.753  | 46.000 | <i>Experiment 1</i> |
| NT  | mouth_movement         | N170 Latency              | 178.693 | 19.281 | 46.000 | <i>Experiment 1</i> |
| ASD | eye_contact            | P300                      | 3.141   | 2.457  | 23.000 | <i>Experiment 1</i> |
| ASD | mouth_movement         | P300                      | 3.061   | 2.432  | 23.000 | <i>Experiment 1</i> |
| NT  | eye_contact            | P300                      | 2.128   | 1.592  | 46.000 | <i>Experiment 1</i> |
| NT  | mouth_movement         | P300                      | 1.319   | 1.431  | 46.000 | <i>Experiment 1</i> |
| ASD | averted gaze           | N170 Amplitude            | -3.681  | 1.356  | 25.000 | <i>Experiment 2</i> |
| ASD | averted gaze           | N170 Latency              | 197.175 | 25.250 | 25.000 | <i>Experiment 2</i> |
| ASD | eye_contact            | N170 Amplitude            | -3.425  | 1.166  | 25.000 | <i>Experiment 2</i> |
| ASD | eye_contact            | N170 Latency              | 188.750 | 19.798 | 25.000 | <i>Experiment 2</i> |
| NT  | averted gaze           | N170 Amplitude            | -3.084  | 1.817  | 43.000 | <i>Experiment 2</i> |
| NT  | averted gaze           | N170 Latency              | 177.869 | 21.297 | 43.000 | <i>Experiment 2</i> |
| NT  | eye_contact            | N170 Amplitude            | -2.590  | 1.538  | 43.000 | <i>Experiment 2</i> |
| NT  | eye_contact            | N170 Latency              | 180.971 | 19.718 | 43.000 | <i>Experiment 2</i> |
| ASD | averted gaze           | P300                      | 1.545   | 1.472  | 25.000 | <i>Experiment 2</i> |
| ASD | eye_contact            | P300                      | 1.310   | 1.434  | 25.000 | <i>Experiment 2</i> |
| NT  | averted gaze           | P300                      | 1.463   | 1.331  | 43.000 | <i>Experiment 2</i> |
| NT  | eye_contact            | P300                      | 0.976   | 1.033  | 43.000 | <i>Experiment 2</i> |
| ASD |                        | N170 Amplitude Difference | -1.476  | 1.458  | 23.000 | <i>Experiment 1</i> |
| ASD |                        | N170 Latency Difference   | -4.533  | 18.550 | 23.000 | <i>Experiment 1</i> |
| NT  |                        | N170 Amplitude Difference | -0.682  | 1.422  | 46.000 | <i>Experiment 1</i> |
| NT  |                        | N170 Latency Difference   | -9.122  | 13.952 | 46.000 | <i>Experiment 1</i> |
| ASD |                        | P300 Amplitude Difference | 0.080   | 1.078  | 23.000 | <i>Experiment 1</i> |
| NT  |                        | P300 Amplitude Difference | 0.809   | 1.113  | 46.000 | <i>Experiment 1</i> |
| ASD |                        | N170 Amplitude Difference | 0.256   | 0.991  | 25.000 | <i>Experiment 2</i> |
| ASD |                        | N170 Latency Difference   | -8.425  | 21.836 | 25.000 | <i>Experiment 2</i> |
| NT  |                        | N170 Amplitude Difference | 0.494   | 0.925  | 43.000 | <i>Experiment 2</i> |
| NT  |                        | N170 Latency Difference   | 3.102   | 18.599 | 43.000 | <i>Experiment 2</i> |
| ASD |                        | P300 Amplitude Difference | -0.234  | 0.969  | 25.000 | <i>Experiment 2</i> |
| NT  |                        | P300 Amplitude Difference | -0.487  | 1.426  | 43.000 | <i>Experiment 2</i> |
